# Supplementary material for: Transcription factor NnMYB5 controls petal color by regulating GLUTATHIONE S-TRANSFERASE2 in Nelumbo nucifera
Source: PubMed Central journal article supplement — Plant Physiol. 2023 Jun 22;193(2):1213–26. doi: 10.1093/plphys/kiad363 (PMC10517185; doi:10.1093/plphys/kiad363), 2023-06-22
Supplement: kiad363_supplementary_data.pdf [file kiad363_supplementary_data.pdf]

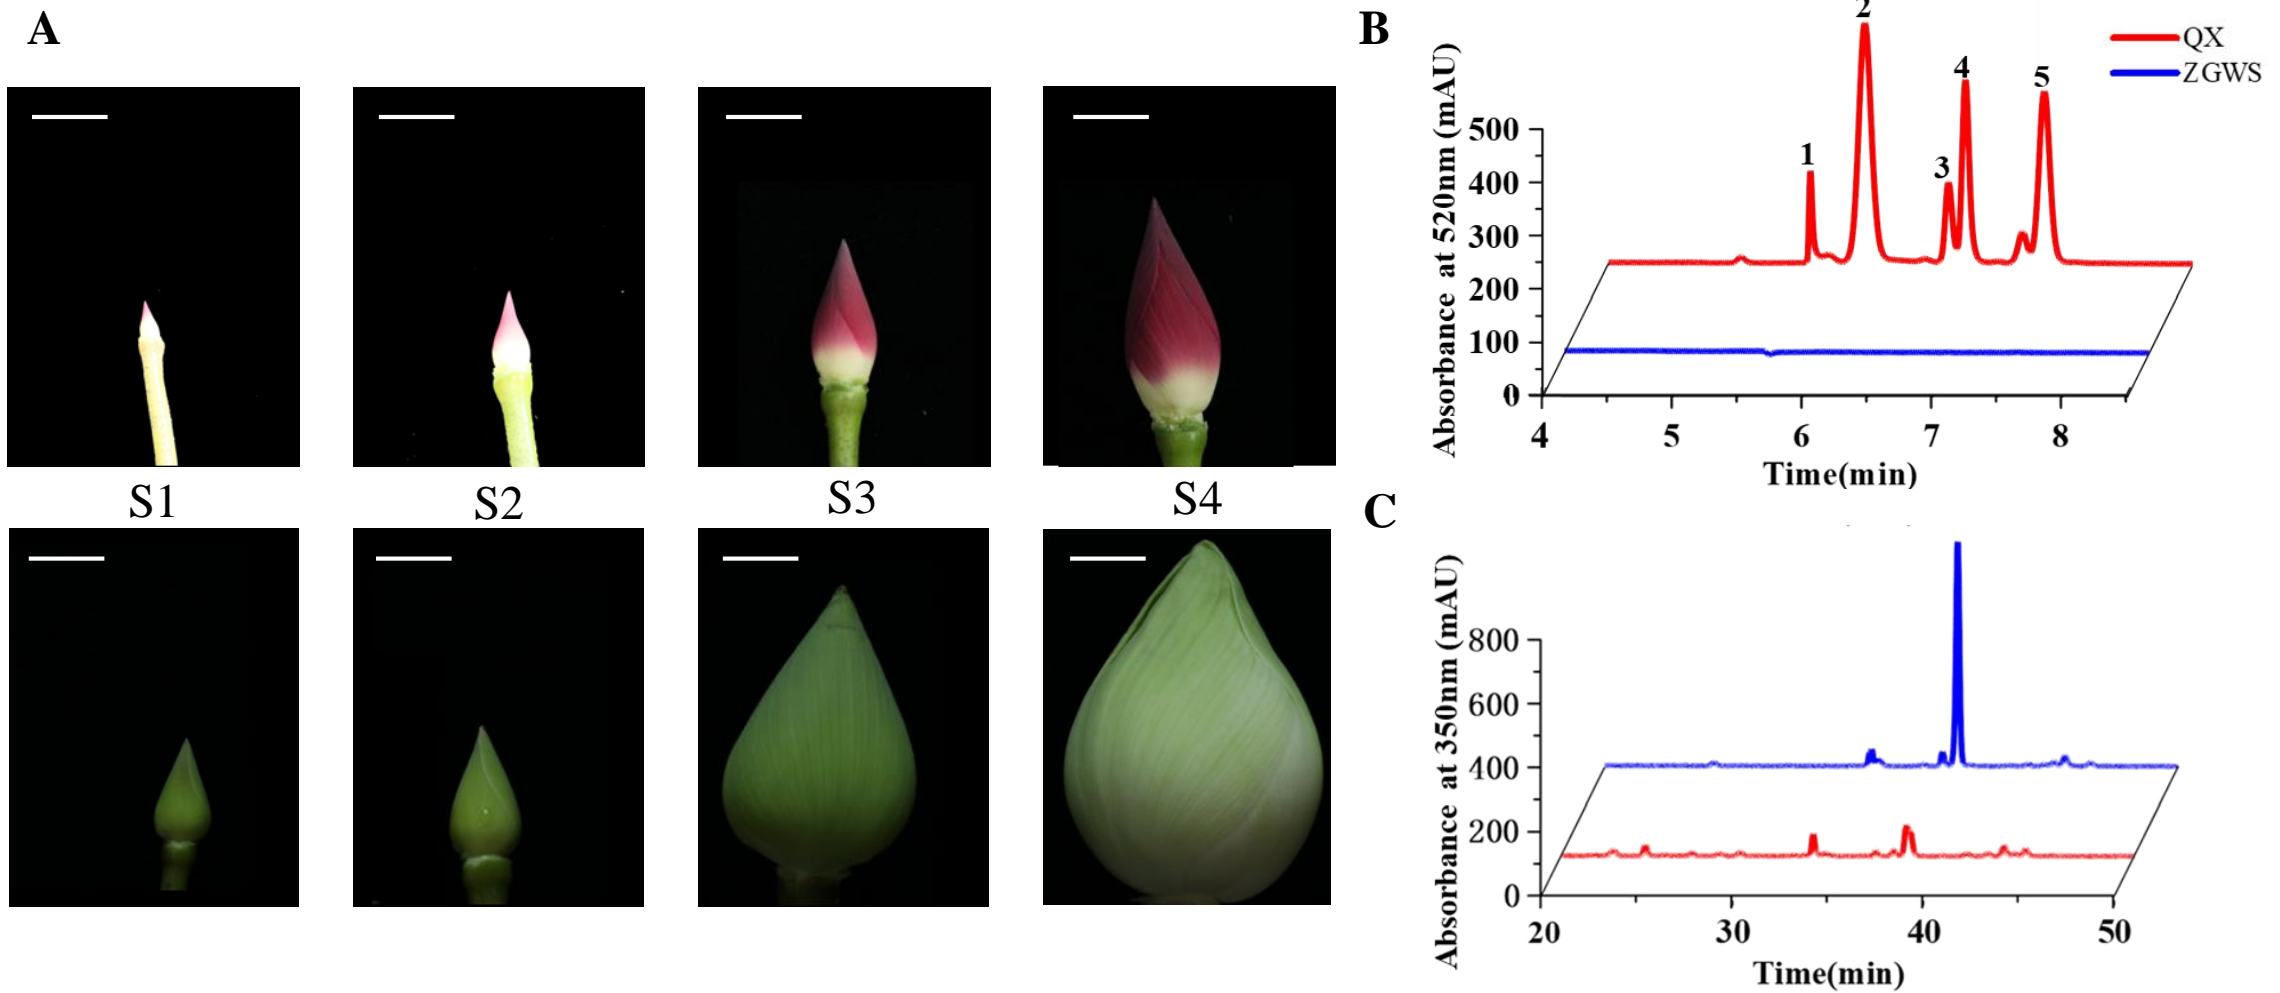

**Supplemental Figure S1.** Flower development and anthocyanin accumulation in the red and white lotus flowers. A. Four flower developmental stages (S1-S4) in the *N. nucifera* cv. ‘QX’ (top) and ‘ZGWS’ (bottom), scale bar = 500 mm. B. High performance liquid chromatography (HPLC) chromatogram of anthocyanin profiles in the red and white petals. Peaks 1–5 were detected in the red petals at 520 nm, which corresponded to delphinidin 3-*O*-glucoside, cyanidin 3-*O*-glucoside, petunidin 3-*O*-glucoside, peonidin 3-*O*-glucoside, and malvidin 3-*O*-glucoside, respectively. C. HPLC chromatogram of flavonoids in the red and white petals detected at 350 nm.

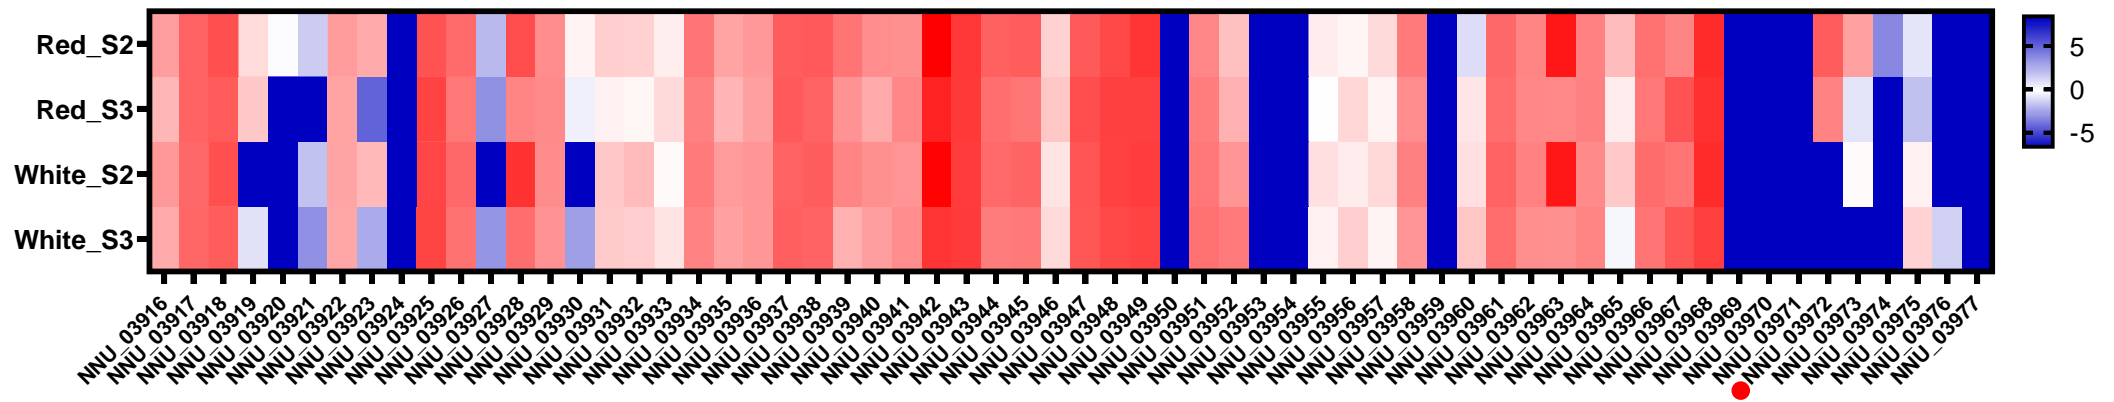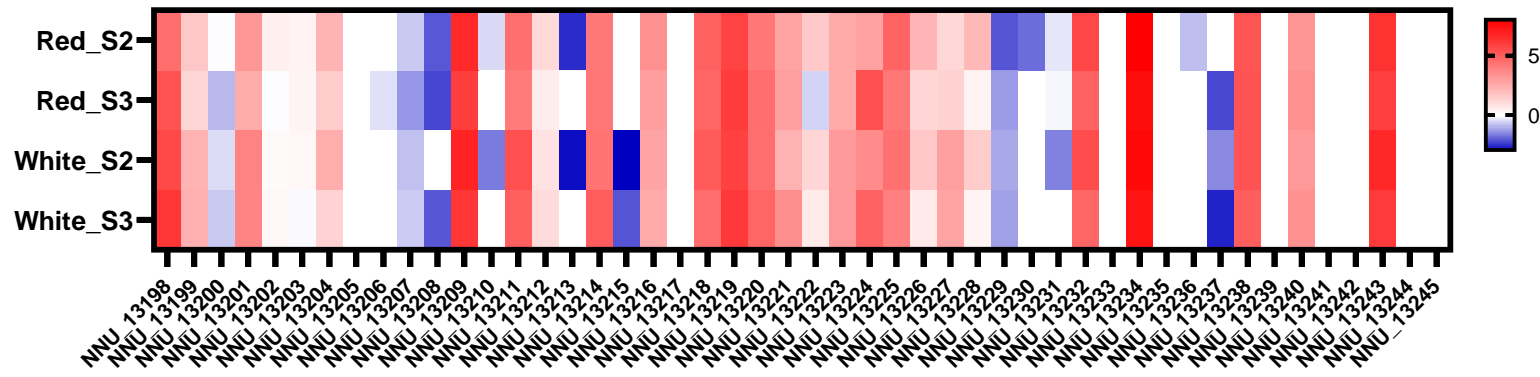

**Supplemental Figure S2.** The expression patterns of 110 genes in the two target intervals between the red and white petals at developmental stages 2 (S2) and stage 3 (S3). The heatmaps illustrate the digital expression level  $\log_2$  (Transcripts per million) in four samples. The red dot in the upper panel indicates the red flower specific expressed *NnMYB5* (*NNU\_03972*) gene.

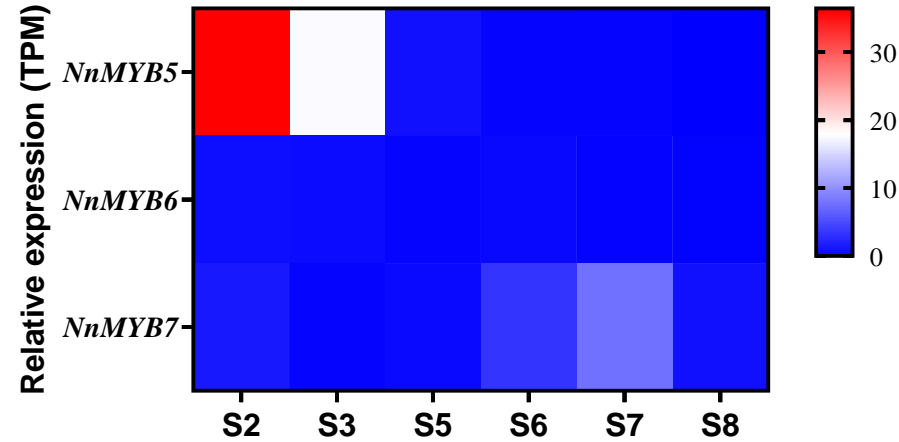

**Supplemental Figure S3.** Digital expression levels of three genes in the 80-kb PAV in red petals at different developmental stages. Transcripts per million (TPM) was used to measure the gene expression level. S2 and S3 are petals at developmental stage 2 and 3 as described in this article, S5 to S8 are petals at developmental stage 5 to stage 8 from flowering flowers reported previously (Liu et al., 2022).

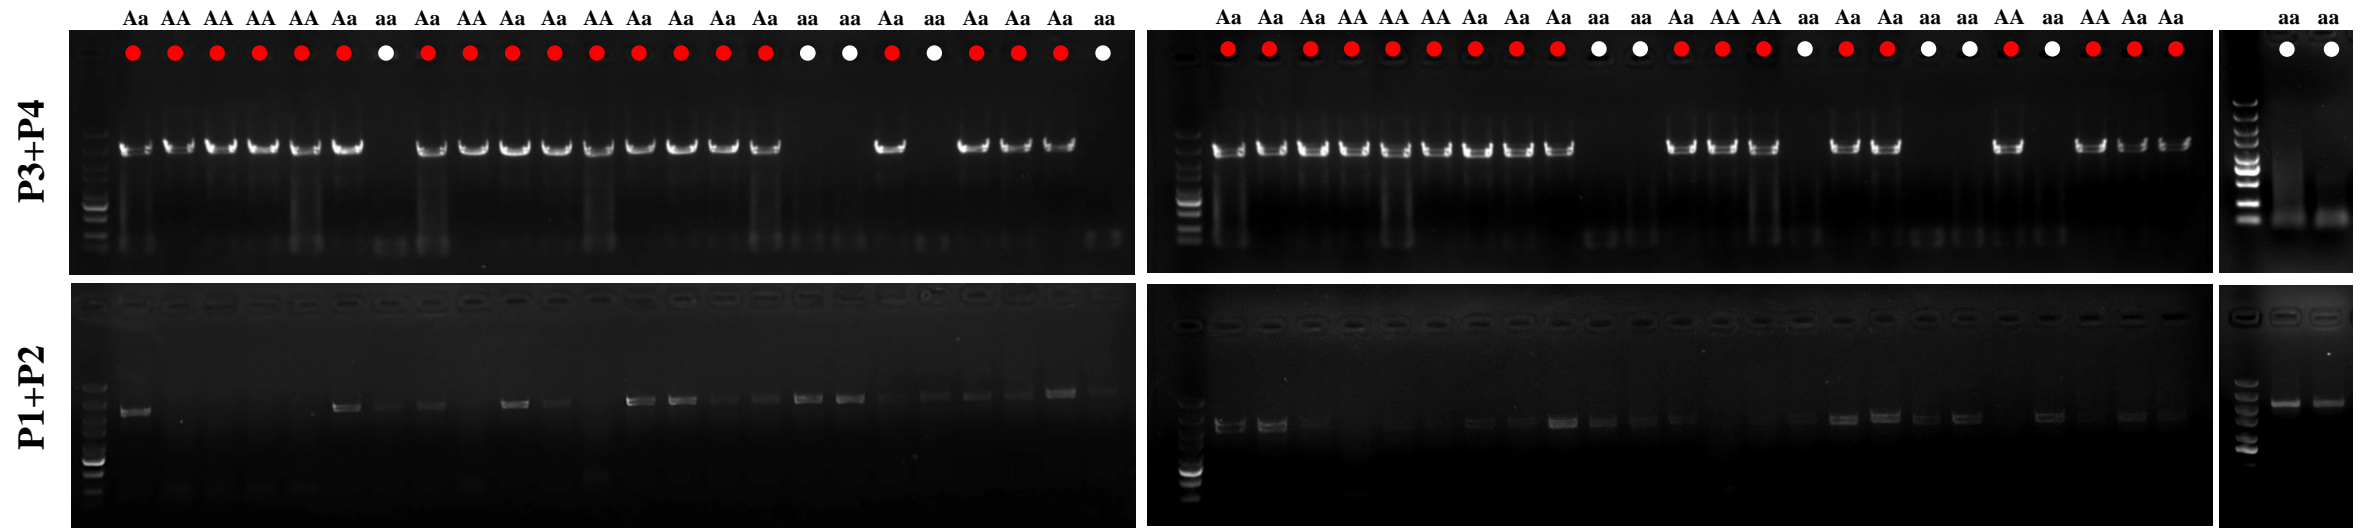

**Supplemental Figure S4.** PCR genotype verification of the F<sub>2</sub> individuals used in this study. Primers P1/P2 and P3/P4 were used to amplify the gDNA of lotus F<sub>2</sub> individuals, and 13, 24, and 13 individuals with AA, Aa, and aa genotypes, respectively, were identified. Red and white dots represent lotus individuals with the red and white flowers.

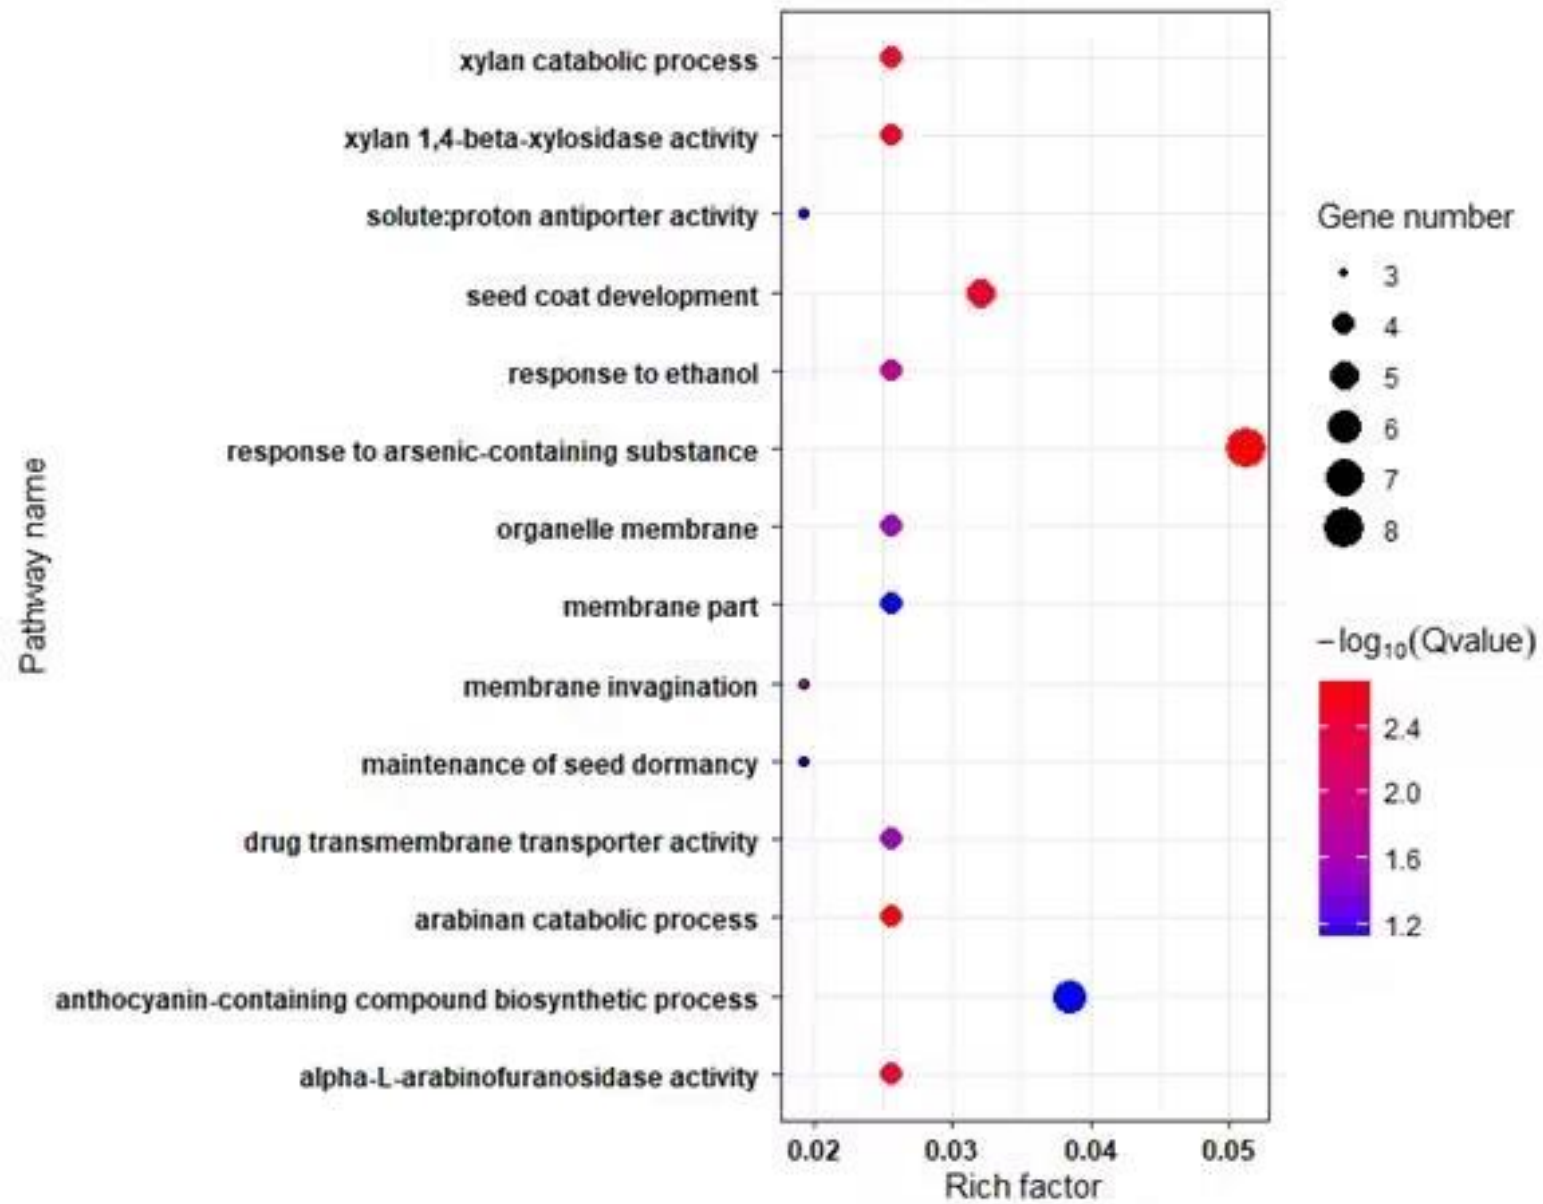

**Supplemental Figure S5.** GO enrichment of the 170 DEGs.

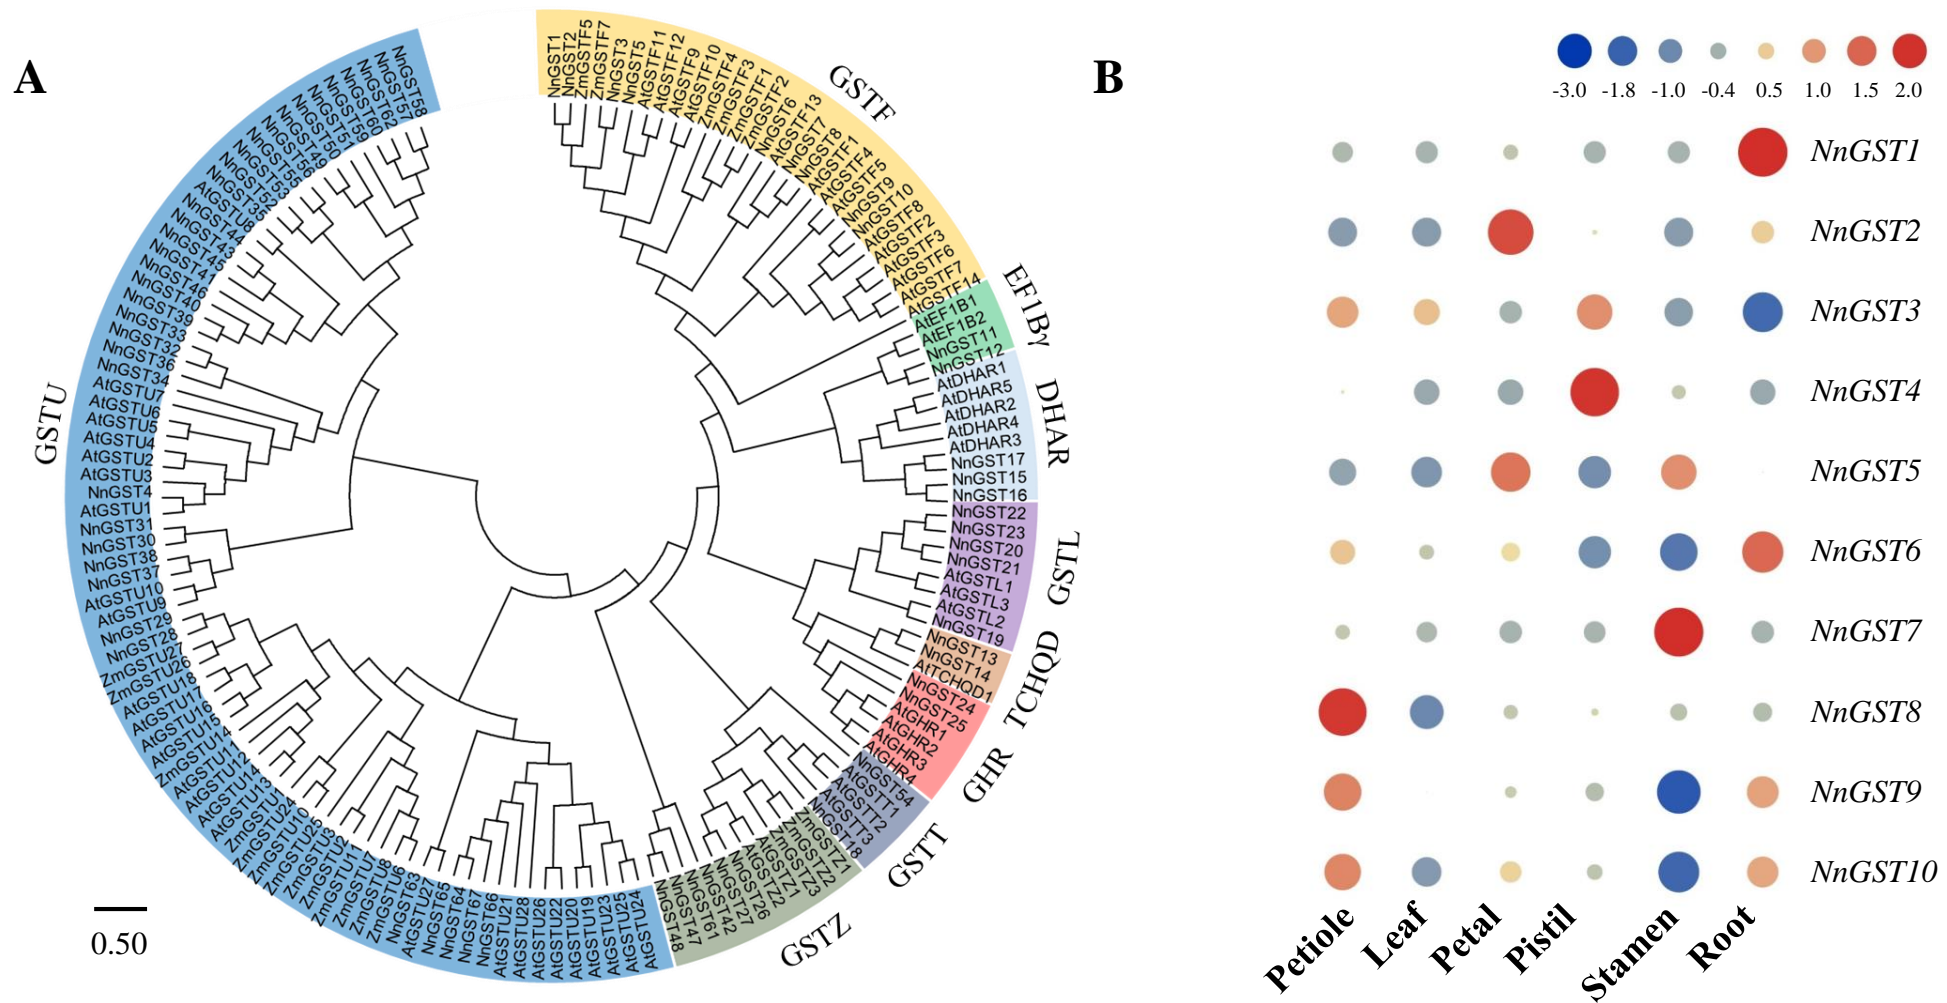

**Supplemental Figure S6.** Phylogenetic analysis and expression patterns of GSTs in *N. nucifera*. A. Phylogenetic tree of GSTs from *A. thaliana*, *Z. mays*, and *N. nucifera*. The 62 *Arabidopsis*, 20 maize, and 67 lotus GST protein sequences were aligned using ClustalW. The phylogenetic tree was constructed based on the neighbor-joining algorithm, with 1000 bootstrap replicates. The accession numbers of the nine GST classes are listed in Table S5. B. Expression patterns of the ten phi class GSTs in *N. nucifera*. The  $\log_2(\text{FPKM})$  expression levels of GSTs were analyzed using our unpublished RNA-seq data (Heyun Song, Heng Sun and Mei Yang, unpublished data) of petiole, leaf, petal, stamen, and root. Color and size of the dots indicate the value of  $\log_2(\text{FPKM})$ : positive values are in red and negative values are in blue. And the larger the absolute values are, the larger the dots size are.

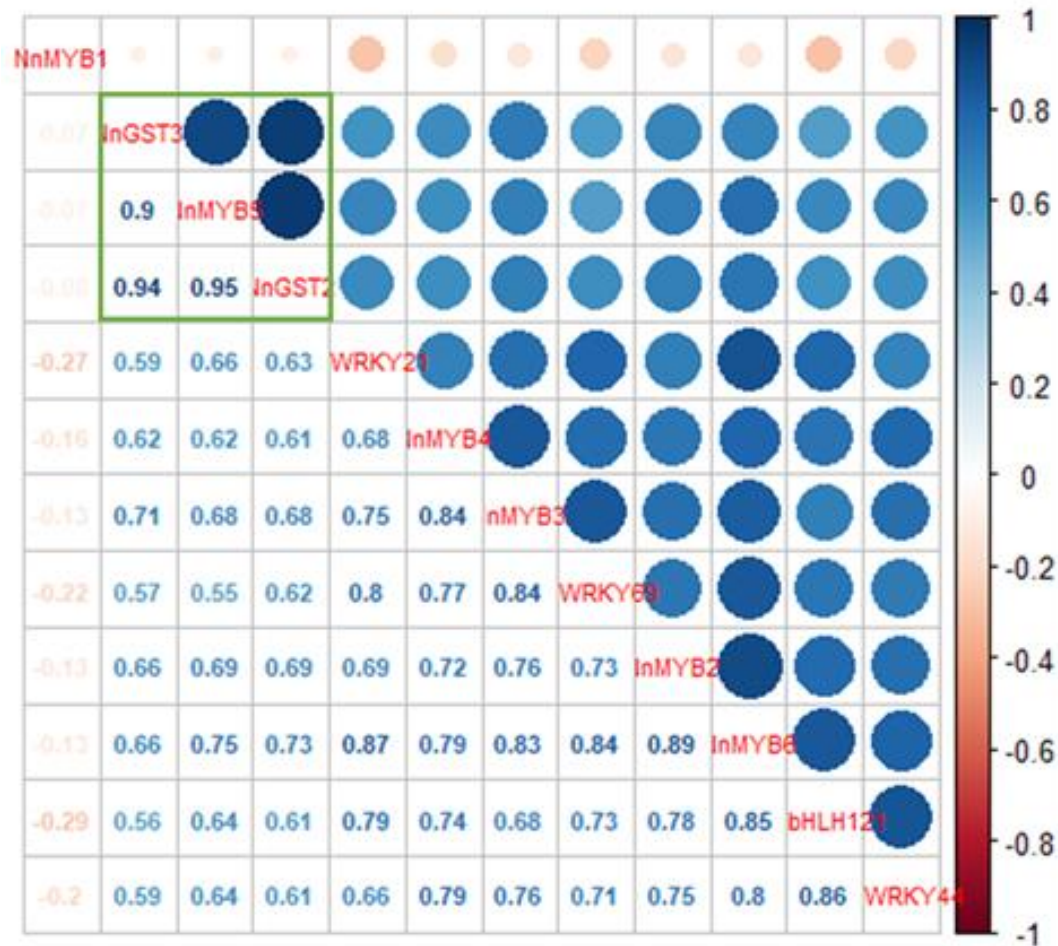

**Supplemental Figure S7.** Pearson correlation analysis between candidate TFs and *NnGST2*. Color towards blue and red represent positive and negative correlations, respectively, while dot size represents the correlation value. The number in each cell show the correlation value as well. The green box showed a high correlation between *NnMYB5* and *NnGST2* and *NnGST3*.

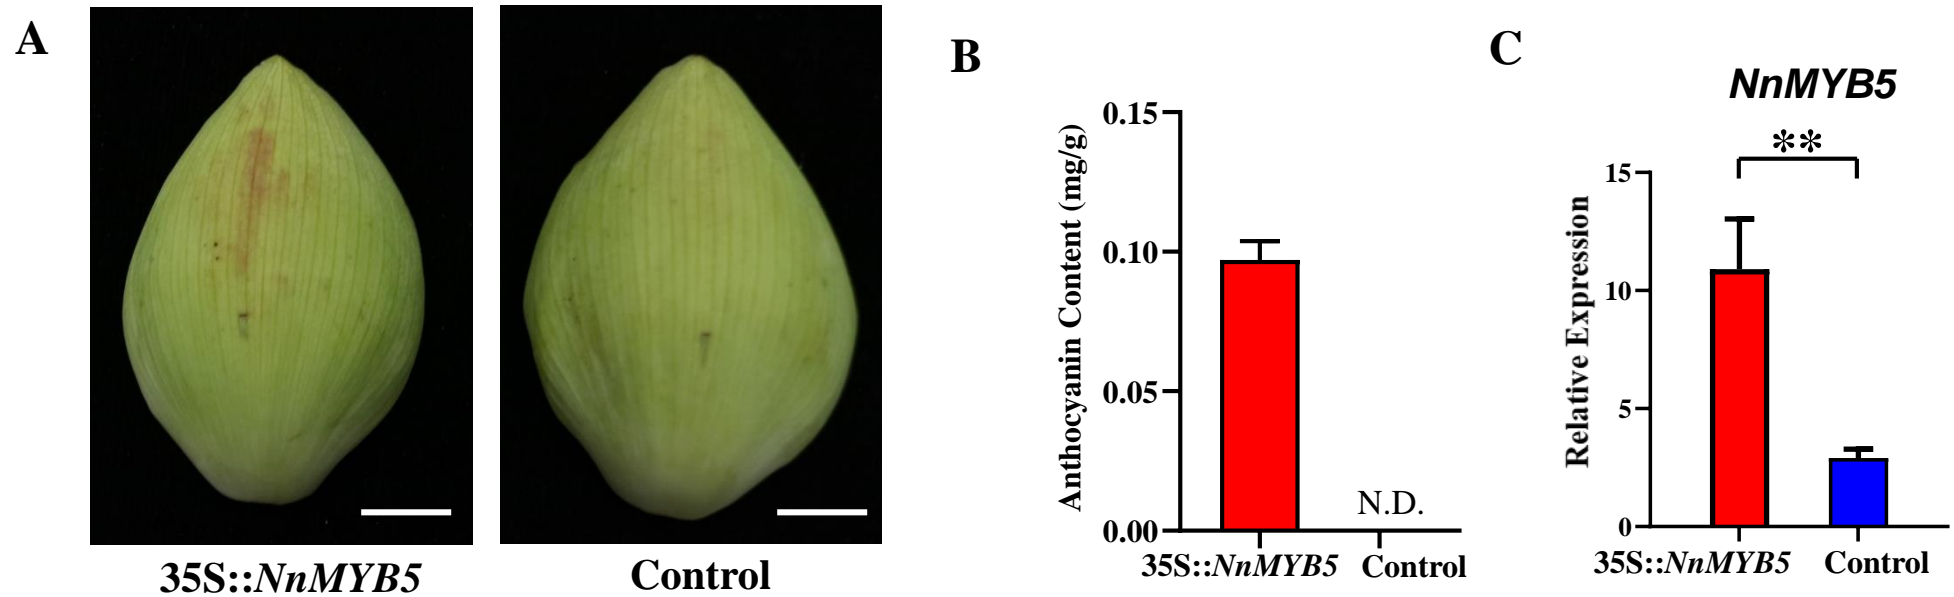

**Supplemental Figure S8.** Transient expression of *NnMYB5* induce anthocyanin accumulation in the white lotus petals. A. The phenotype of lotus petal after transient *NnMYB5* gene expression. Scale bar = 1cm. B. Anthocyanins content in the transgenic 35S::*NnMYB5* lines and control petals. N.D, Not detected. C. Transcript levels of *NnMYB5* in the transgenic 35S::*NnMYB5* lines and control petals. Data are mean  $\pm$  SD ( $n = 3$ ). *t*-test, \*\*  $P < 0.01$  in B and C.



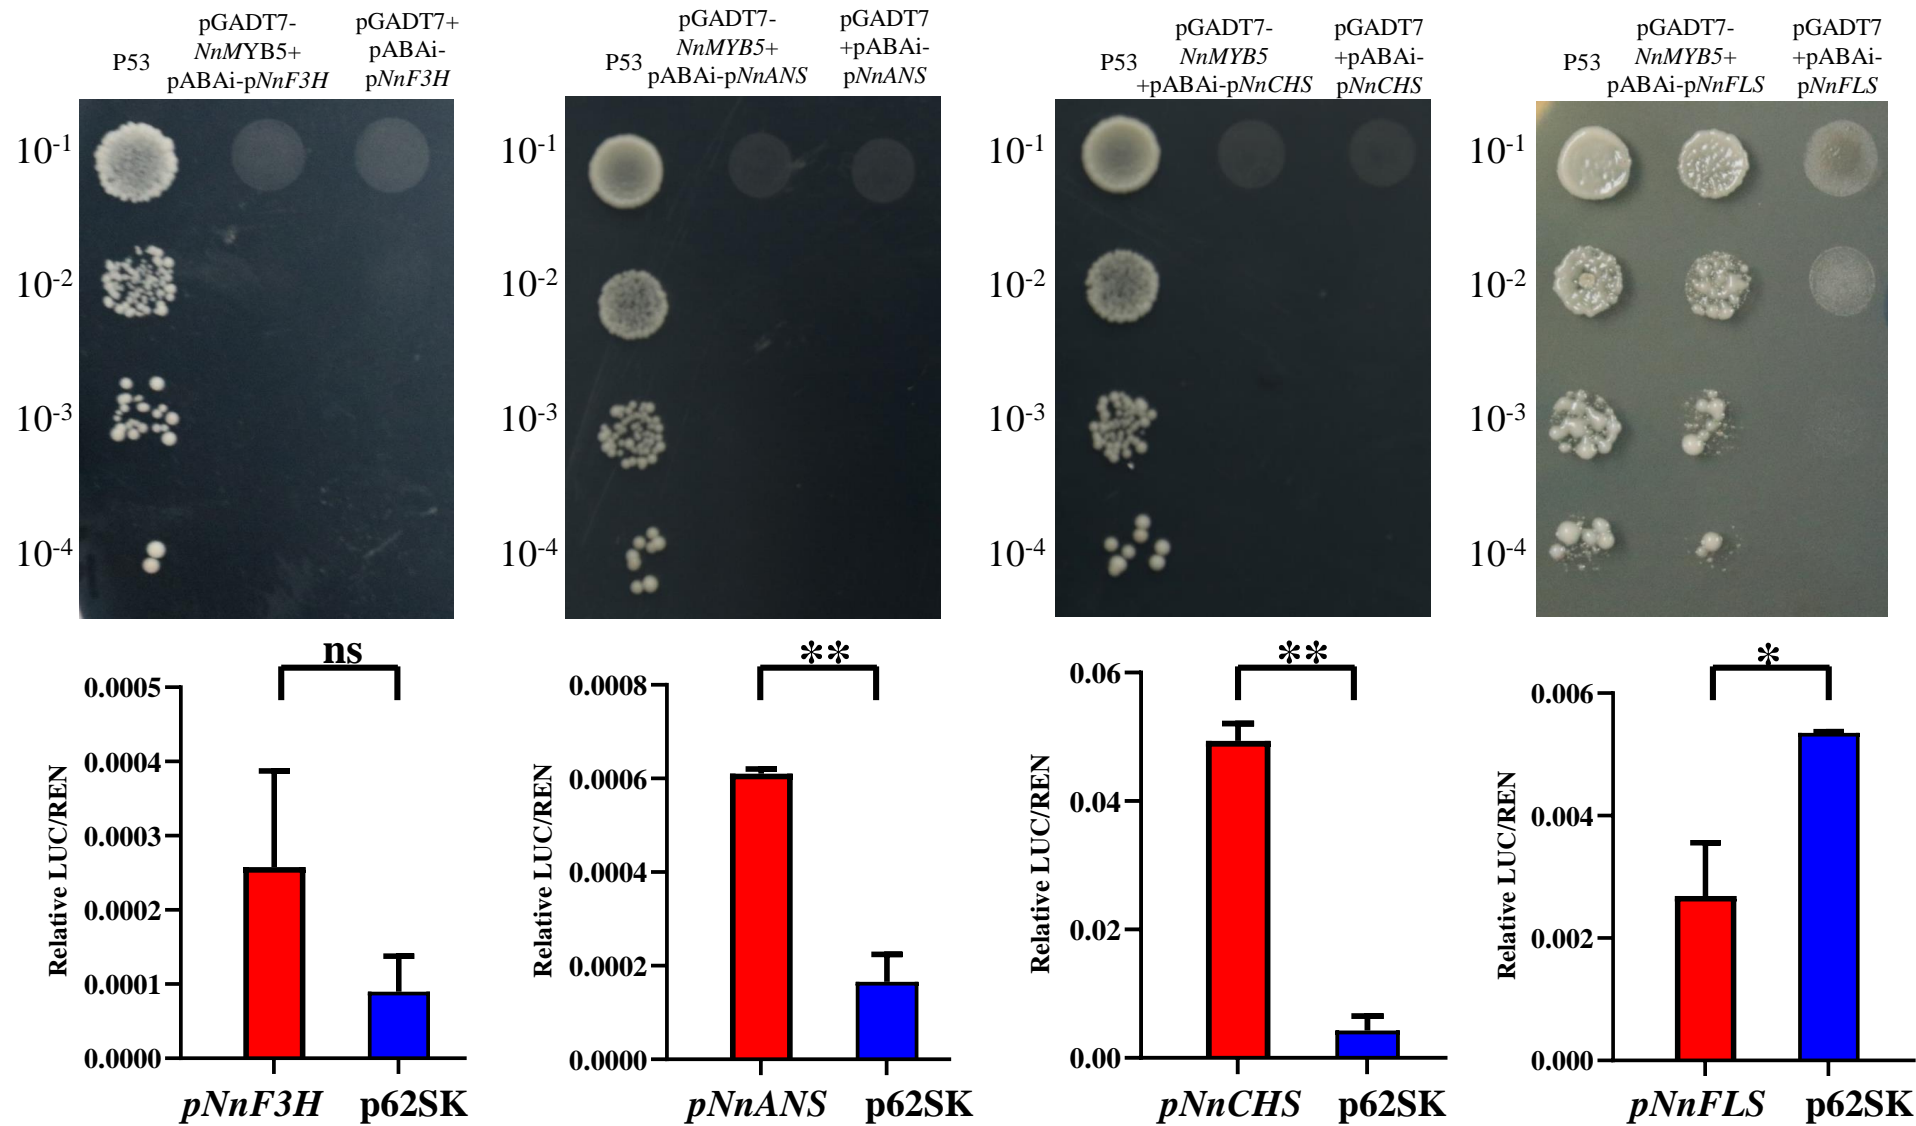

**Supplemental Figure S9.** The yeast one-hybrid (Y1H) and dual-luciferase reporter assay (LUC) validation of NnMYB5 regulatory activity on four anthocyanin synthesis genes. NnMYB5 could activate the promoter of *NnFLS*, but with no effects on the promoters of *NnF3H*, *NnANS*, and *NnCHS*. From top to bottom, the yeast concentrations at OD600 = 0.1, 0.01, 0.001, and 0.0001, respectively. P53 and pGADT7+pABAi-p*NnF3H/ANS/CHS/FLS* were used as positive and negative control in Y1H. p62SK was negative control in LUC. Data are mean  $\pm$  SD ( $n = 3$ ). *t*-test, \*\* $P < 0.01$ , \* $P < 0.05$ .

**Supplemental Table S1.** Primers used in this study.

| <b>Primer</b>   | <b>Sequence (3'-5')</b>                    |
|-----------------|--------------------------------------------|
| NnGST2-QPCR-F   | GCAGTTTGCCCTCAGAGAGT                       |
| NnGST2-QPCR-R   | GCCCTTGACTCAAAGAGCCT                       |
| NnMYB5-QPCR-F   | CAAAACGCGGTTGAGCAAGA                       |
| NnMYB5-QPCR-R   | GAGATCGTCTGTAGGCGGTG                       |
| NnCHS-QPCR-F    | CTGTGTCGACCAGAGCACAT                       |
| NnCHS-QPCR-R    | CTCCTCGGTCAAGTGCATGT                       |
| NnF3H-QPCR-F    | CATTGCGCCGAGATGTACCGA                      |
| NnF3H-QPCR-R    | TTTTGCTTTCCGCTTCCAGC                       |
| NnFLS-QPCR-F    | ATCGACACCATCCCTCCTGA                       |
| NnFLS-QPCR-R    | TTGACGACCTGGAAGATGCC                       |
| NnANS-QPCR-F    | GGCTCAACCACTTGCAAGTTG                      |
| NnANS-QPCR-R    | AGCTCTTCTTGAGGACGCAC                       |
| AtANS-QPCR-F    | TGGAAGCTCACACCGATGTAAG                     |
| AtANS-QPCR-R    | CGGAGACTCAACACTCACCATC                     |
| AtCHI-QPCR-F    | TCACGAAGCTTCATGTAGACTCC                    |
| AtCHI-QPCR-R    | CCTTGATATCAAGGCCCTCGGA                     |
| AtF3H-QPCR-F    | CAAGACATGGATTACGGTTCAGC                    |
| AtF3H-QPCR-R    | ACGTGGCTATGGATAATCTGCTC                    |
| AtF3'H-QPCR-F   | GATCTTGACGGTGACGGAGGAA                     |
| AtF3'H-QPCR-R   | GCGATGTGTGGTAACGAGAGTG                     |
| AtFLS-QPCR-F    | ATGCGTCAATTACAGATTCTGGCCT                  |
| AtFLS-QPCR-R    | TTCTTTCAACGCATCACGCTTTAAC                  |
| pNnANS-pABAI-F  | TTGAATTCGAGCTCGGTACCTTTGGTCTTGGGGCCTTAGG   |
| pNnANS-pABAI-R  | GAGCACATGCCTCGAGTGGATCTGCTATAAACACAGCT     |
| pNnFLS-pABAI-F  | TTGAATTCGAGCTCGGTACCACTTGCAGCAATAGGTAGGC   |
| pNnFLS-pABAI-R  | GAGCACATGCCTCGAGAAGCTCCAGATAGGTTTCTAT      |
| pNnF3H-pABAI-F  | TTGAATTCGAGCTCGGTACCTCGACTGGCCCAATTCAAAA   |
| pNnF3H-pABAI-R  | GAGCACATGCCTCGAGTTGCGTGTACGGTTATG          |
| pNnCHS-pABAI-F  | TTGAATTCGAGCTCGGTACCTTTGCCTCAACCCAAACCTG   |
| pNnCHS-pABAI-R  | GAGCACATGCCTCGAGCGCCTTGAGCTAGCTGAGAG       |
| pNnGST2-pABAI-F | TTGAATTCGAGCTCGGTACCGTTGTTCCAAACCACACATTCT |
| pNnGST2-pABAI-R | GAGCACATGCCTCGAGTTTTCTGTGCAAAAGTGGAGACA    |
| AD-NnMYB5-F     | CAGATTACGCTCATATGATGGATGGTGGTTTGGGTTTG     |
| AD-NnMYB5-R     | TGCTTGGGTGGAATTCTCAATAACTCCACCACCTATGA     |
| pNnFLS-p0800-F  | CTTGATATCGAATTCCTGCAGACTTGCAGCAATAGGTAGGC  |
| pNnFLS-p0800-R  | CGCTCTAGAAGTGGATCCAAGCTCCAGATAGGTTTCTAT    |
| pNnANS1-p0800-F | CTTGATATCGAATTCCTGCAGTTTGGTCTTGGGGCCTTAGG  |
| pNnANS1-p0800-R | CGCTCTAGAAGTGGATCCTGGATCTGCTATAAACACAGCT   |
| pNnF3H-p0800-F  | CTTGATATCGAATTCCTGCAGTCGACTGGCCCAATTCAAAA  |
| pNnF3H-p0800-R  | CGCTCTAGAAGTGGATCCTTGCCTGTACGGTTATG        |
| pNnCHS-p0800-F  | CTTGATATCGAATTCCTGCAGTTTGCCTCAACCCAAACCTG  |

|                 |                                              |
|-----------------|----------------------------------------------|
| pNnCHS-p0800-R  | CGCTCTAGAACTAGTGGATCCCGCCTTGAGCTAGCTGAGAG    |
| pNnGST2-p0800-F | CTTGATATCGAATTCCTGCAGGTTGTTCCAAACCACACATTCT  |
| pNnGST2-p0800-R | CGCTCTAGAACTAGTGGATCCTTTTCTGTGCAAAAGTGGAGACA |
| NnMYB5-p62sk-F  | CGCTCTAGAACTAGTGGATCCATGGATGGTGGTTTGGGTTTG   |
| NnMYB5-p62sk-R  | CTTGATATCGAATTCCTGCAGTCAATAACTCCACCACCTATGA  |
| P1              | GGAAGGATTATGCAATAGATCCGAGC                   |
| P2              | CGAACTGGTTCAGACCCAAAATTAATTATT               |
| P3              | GAAGTTTTTGGAGTTGATTACGTGTGAC                 |
| P4              | TCAATAACTCCACCACCTATGATTCAT                  |

---

**Supplemental Table S2.** List of natural lotus accessions tested in Fig. 2b. The P1/P2 and P3/P4 primers were used for PCR verification.

| No. | Lotus Accession       | Flower color | P1/P2* | P3/P4** |
|-----|-----------------------|--------------|--------|---------|
| 1   | Marker                |              |        |         |
| 2   | Zao Bai Xue           | White        | Yes    | No      |
| 3   | Guang Han Gong        | White        | Yes    | No      |
| 4   | Bai Ge                | White        | Yes    | No      |
| 5   | Xiao Bi Lian          | White        | Yes    | No      |
| 6   | Xi Wang               | White        | Yes    | No      |
| 7   | Dan Yue               | White        | Yes    | No      |
| 8   | Bai Ying Lian         | White        | Yes    | No      |
| 9   | Qing Xia              | White        | Yes    | No      |
| 10  | Qing He               | White        | Yes    | No      |
| 11  | Shui Jing Bai         | White        | Yes    | No      |
| 12  | Luan Feng Yu          | White        | Yes    | No      |
| 13  | Tai Zhen Chu Yu       | White        | Yes    | No      |
| 14  | Jiang Fu Qu           | Red          | No     | Yes     |
| 15  | Qiu Hong Yang         | Red          | No     | Yes     |
| 16  | Zhi Zun Ling Xiao     | Red          | No     | Yes     |
| 17  | Wu Zhi Zi 2 Hao       | Red          | No     | Yes     |
| 18  | Jin Ling Huo Du       | Red          | No     | Yes     |
| 19  | Jun Jie               | Red          | No     | Yes     |
| 20  | Hong Tong Shuai       | Red          | No     | Yes     |
| 21  | Dong Fang Hong        | Red          | No     | Yes     |
| 22  | Qian Tang Hong Lou    | Red          | No     | Yes     |
| 23  | Hong Deng Long        | Red          | No     | Yes     |
| 24  | Jian Xuan 17          | Red          | No     | Yes     |
| 25  | Chinese Ancient Lotus | Red          | No     | Yes     |
| 26  | Hong Hua Jian Lian*** | Red          | Yes    | Yes     |
| 27  | Cun San Lian***       | Red          | Yes    | Yes     |
| 28  | Negative control      |              |        |         |
| 29  | Marker                |              |        |         |

\*The P1/P2 primers cover 2 kb sequence for white flower genotypes with the 80 kb deletion and 82 kb for red flower genotypes with the 80-kb sequence present, which can not be amplified by regular polymerase used in PCR reaction.

\*\*The P3/P4 primers cover 3.6 kb sequence of the NnMYB5 gene in the deleted region, which is present in red flower genotypes, but deleted in the 80-kb PAV in white flowers.

\*\*\*These two are hybrid cultivars with heterozygous genotypes.

**Supplemental Table S3.** Summary statistics of clean reads and RNA-seq mapping results.

| <b>Samples</b> | <b>Total Reads</b> | <b>Mapped Rate</b> | <b>Uniq Mapped Reads</b> | <b>Uniq Mapped Reads Ratio</b> |
|----------------|--------------------|--------------------|--------------------------|--------------------------------|
| QX2-1          | 24334644           | 92.29%             | 18841718                 | 77.43%                         |
| QX2-2          | 23820860           | 91.22%             | 18067443                 | 75.85%                         |
| QX2-3          | 24641784           | 91.04%             | 18617278                 | 75.55%                         |
| QX3-1          | 24797114           | 90.80%             | 18711755                 | 75.46%                         |
| QX3-2          | 23401357           | 90.46%             | 17675944                 | 75.53%                         |
| QX3-3          | 24112698           | 91.25%             | 18469458                 | 76.60%                         |
| ZGWS2-1        | 19382089           | 91.23%             | 16407032                 | 85.91%                         |
| ZGWS2-2        | 23976710           | 90.95%             | 18567077                 | 77.44%                         |
| ZGWS2-3        | 22956946           | 92.82%             | 18178982                 | 79.19%                         |
| ZGWS4-1        | 23277011           | 91.92%             | 18278177                 | 78.52%                         |
| ZGWS4-2        | 24277354           | 91.77%             | 18859523                 | 77.68%                         |
| ZGWS4-3        | 24316265           | 90.73%             | 18697593                 | 76.89%                         |

**Supplemental Table S4.** List of the 170 overlapping DEGs between the white and red petal at developmental stages 2 and 3.

| Gene      | baseMean | log2Fold<br>Change | lfcSE | stat   | pvalue   | padj     | gene_name                                                |
|-----------|----------|--------------------|-------|--------|----------|----------|----------------------------------------------------------|
| NNU_23566 | 816.369  | -13.072            | 1.193 | -      | 4.41E-24 | 8.70E-21 | cysteine proteinase inhibitor 12-like                    |
|           |          |                    |       | 10.122 |          |          |                                                          |
| NNU_16737 | 426.109  | -12.453            | 1.192 | -9.608 | 7.37E-22 | 9.70E-19 | respiratory burst oxidase homolog protein B-like         |
| NNU_00015 | 405.574  | -12.201            | 1.212 | -9.239 | 2.48E-20 | 2.94E-17 | mitochondrial inner membrane protease subunit 2          |
| NNU_10157 | 216.162  | -11.719            | 1.221 | -8.782 | 1.61E-18 | 1.52E-15 | protein SRG1-like                                        |
| NNU_24884 | 311.176  | -11.686            | 1.220 | -8.757 | 2.01E-18 | 1.83E-15 | probable F-box protein At4g22030                         |
| NNU_22382 | 176.163  | -11.194            | 1.279 | -7.969 | 1.60E-15 | 1.08E-12 | --                                                       |
| NNU_22683 | 224.385  | -11.186            | 1.229 | -8.285 | 1.18E-16 | 9.31E-14 | serine/threonine-protein kinase SAPK2                    |
| NNU_26180 | 142.305  | -10.586            | 1.202 | -7.973 | 1.55E-15 | 1.08E-12 | membrane-bound transcription factor site-1 protease-like |
| NNU_15469 | 116.931  | -10.585            | 1.205 | -7.954 | 1.80E-15 | 1.19E-12 | --                                                       |
| NNU_22188 | 135.865  | -10.422            | 1.237 | -7.615 | 2.64E-14 | 1.45E-11 | "putative protein TPRXL, partial"                        |
| NNU_00312 | 124.065  | -10.407            | 1.227 | -7.667 | 1.75E-14 | 1.01E-11 | ABSCISIC ACID-INSENSITIVE 5-like protein 2               |
| NNU_15713 | 94.774   | -10.246            | 1.226 | -7.541 | 4.67E-14 | 2.40E-11 | uncharacterized protein LOC104590517                     |
| NNU_23714 | 98.694   | -10.228            | 1.211 | -7.623 | 2.48E-14 | 1.40E-11 | putative wall-associated receptor kinase-like 16         |
| NNU_15649 | 89.133   | -10.169            | 1.261 | -7.271 | 3.56E-13 | 1.48E-10 | 17.8 kDa class I heat shock protein-like                 |
| NNU_19240 | 100.187  | -10.163            | 1.250 | -7.333 | 2.26E-13 | 9.90E-11 | unnamed protein product                                  |
| NNU_02817 | 99.740   | -10.102            | 1.215 | -7.491 | 6.84E-14 | 3.32E-11 | aspartic proteinase-like protein 2 isoform X3            |
| NNU_23141 | 91.880   | -9.928             | 1.213 | -7.358 | 1.87E-13 | 8.48E-11 | protein ROOT PRIMORDIUM DEFECTIVE 1-like                 |
| NNU_13735 | 63.364   | -9.720             | 1.246 | -7.000 | 2.57E-12 | 9.21E-10 | probable beta-D-xylosidase 7                             |
| NNU_08149 | 67.092   | -9.642             | 1.218 | -7.097 | 1.27E-12 | 5.20E-10 | --                                                       |
| NNU_03879 | 57.828   | -9.507             | 1.255 | -6.781 | 1.20E-11 | 3.88E-09 | unnamed protein product                                  |

|           |         |        |       |        |           |            |                                                                         |
|-----------|---------|--------|-------|--------|-----------|------------|-------------------------------------------------------------------------|
| NNU_09307 | 68.318  | -9.477 | 1.533 | -5.531 | 3.19E-08  | 6.09E-06   | --                                                                      |
| NNU_15654 | 66.851  | -9.406 | 1.226 | -6.855 | 7.12E-12  | 2.41E-09   | 17.8 kDa class I heat shock protein-like                                |
| NNU_25211 | 60.975  | -8.960 | 1.256 | -6.337 | 2.34E-10  | 6.75E-08   | uncharacterized protein LOC104609439                                    |
| NNU_11856 | 34.013  | -8.521 | 1.262 | -5.961 | 2.51E-09  | 5.87E-07   | myosin-17-like                                                          |
| NNU_22390 | 26.905  | -8.372 | 1.298 | -5.678 | 1.36E-08  | 2.80E-06   | 17.8 kDa class I heat shock protein-like                                |
| NNU_13311 | 26.251  | -8.371 | 1.297 | -5.685 | 1.31E-08  | 2.72E-06   | protein TRANSPARENT TESTA 12 isoform X2                                 |
| NNU_13738 | 22.142  | -8.201 | 1.315 | -5.476 | 4.35E-08  | 8.05E-06   | 60S ribosomal protein L27-3                                             |
| NNU_23154 | 24.698  | -8.133 | 1.275 | -5.592 | 2.24E-08  | 4.46E-06   | --                                                                      |
| NNU_00214 | 25.227  | -7.951 | 1.288 | -5.396 | 6.81E-08  | 1.23E-05   | WRKY transcription factor 44-like isoform X2                            |
| NNU_19360 | 21.097  | -7.842 | 1.313 | -5.210 | 1.89E-07  | 3.22E-05   | uncharacterized protein LOC104590526                                    |
| NNU_09901 | 118.715 | -7.811 | 0.770 | -8.845 | 9.18E-19  | 9.45E-16   | ABC transporter A family member 8-like isoform X1                       |
| NNU_04203 | 27.154  | -7.756 | 1.303 | -5.185 | 2.16E-07  | 3.65E-05   | probable LRR receptor-like serine/threonine-protein kinase<br>At4g29180 |
| NNU_14773 | 17.829  | -7.696 | 1.364 | -4.909 | 9.13E-07  | 0.00013427 | serine/threonine-protein kinase 4-like isoform X3                       |
| NNU_06805 | 16.418  | -7.676 | 1.372 | -4.867 | 1.13E-06  | 0.00016575 | --                                                                      |
| NNU_20253 | 218.200 | -7.134 | 0.722 | -8.500 | 1.90E-17  | 1.55E-14   | (S)-scoulerine 9-O-methyltransferase-like                               |
| NNU_00289 | 12.788  | -7.097 | 1.396 | -4.367 | 1.26E-05  | 0.00145736 | uncharacterized protein LOC104590939                                    |
| NNU_24947 | 190.275 | -7.082 | 0.612 | -9.939 | 2.82E-23  | 5.13E-20   | geraniol 8-hydroxylase-like                                             |
| NNU_22643 | 345.328 | -6.988 | 1.100 | -5.443 | 5.24E-08  | 9.61E-06   | bet1-like protein At4g14600                                             |
| NNU_21960 | 11.104  | -6.845 | 1.465 | -3.989 | 6.62E-05  | 0.00661584 | uncharacterized protein LOC104611094                                    |
| NNU_05557 | 11.530  | -6.787 | 1.463 | -3.955 | 7.67E-05  | 0.00750079 | uncharacterized protein LOC104601004                                    |
| NNU_18233 | 8.454   | -6.549 | 1.576 | -3.520 | 0.0004314 | 0.03404077 | pectinesterase 2-like                                                   |
| NNU_08863 | 44.834  | -5.746 | 0.835 | -5.686 | 1.30E-08  | 2.72E-06   | putative ATP-dependent RNA helicase C550.03c                            |
| NNU_00034 | 193.292 | -5.671 | 0.371 | -      | 2.26E-36  | 8.91E-33   | uncharacterized protein LOC104610799                                    |
|           |         |        |       | 12.595 |           |            |                                                                         |
| NNU_08874 | 210.973 | -5.585 | 0.722 | -6.350 | 2.16E-10  | 6.30E-08   | myeloid leukemia factor 1-like                                          |

|           |          |        |       |        |           |            |                                                                                |
|-----------|----------|--------|-------|--------|-----------|------------|--------------------------------------------------------------------------------|
| NNU_13308 | 43.386   | -5.442 | 0.932 | -4.764 | 1.90E-06  | 0.00026095 | protein TRANSPARENT TESTA 12 isoform X1                                        |
| NNU_04612 | 147.265  | -4.961 | 0.572 | -6.924 | 4.40E-12  | 1.51E-09   | protein GAMETE EXPRESSED 1                                                     |
| NNU_19771 | 3826.870 | -4.758 | 0.233 | -      | 1.31E-58  | 1.56E-54   | uncharacterized protein LOC104611349 isoform X3                                |
|           |          |        |       | 16.141 |           |            |                                                                                |
| NNU_15680 | 337.714  | -4.679 | 0.527 | -6.975 | 3.06E-12  | 1.08E-09   | probable glutathione S-transferase                                             |
| NNU_21748 | 227.803  | -4.476 | 0.508 | -6.838 | 8.01E-12  | 2.63E-09   | probable rhamnose biosynthetic enzyme 1                                        |
| NNU_19770 | 1678.850 | -4.287 | 0.272 | -      | 1.39E-33  | 4.70E-30   | uncharacterized protein LOC104611349 isoform X2                                |
|           |          |        |       | 12.077 |           |            |                                                                                |
| NNU_11700 | 490.666  | -4.199 | 0.323 | -9.903 | 4.03E-23  | 6.81E-20   | --                                                                             |
| NNU_06538 | 57.147   | -3.830 | 0.569 | -4.971 | 6.67E-07  | 0.00010327 | "D-glycerate 3-kinase, chloroplastic-like isoform X2"                          |
| NNU_10613 | 34.255   | -3.824 | 0.627 | -4.503 | 6.70E-06  | 0.00082998 | uncharacterized protein LOC104589622                                           |
| NNU_06703 | 374.750  | -3.725 | 0.283 | -9.632 | 5.85E-22  | 8.66E-19   | "pentatricopeptide repeat-containing protein At3g46790,<br>chloroplastic-like" |
| NNU_03850 | 110.012  | -3.647 | 0.562 | -4.714 | 2.43E-06  | 0.00032847 | uncharacterized protein LOC104589371                                           |
| NNU_13516 | 66.381   | -3.541 | 0.459 | -5.537 | 3.09E-08  | 5.94E-06   | --                                                                             |
| NNU_11876 | 94.754   | -3.524 | 0.597 | -4.231 | 2.33E-05  | 0.00258961 | probable beta-D-xylosidase 7                                                   |
| NNU_10305 | 201.397  | -3.522 | 0.416 | -6.066 | 1.31E-09  | 3.19E-07   | uncharacterized protein LOC104602797 isoform X2                                |
| NNU_03849 | 42.981   | -3.364 | 0.660 | -3.581 | 0.0003427 | 0.02807007 | uncharacterized protein LOC104589372                                           |
| NNU_03561 | 153.921  | -3.279 | 0.344 | -6.632 | 3.31E-11  | 1.03E-08   | uncharacterized protein LOC104597501                                           |
| NNU_21736 | 582.992  | -3.153 | 0.498 | -4.324 | 1.53E-05  | 0.00175281 | putative glutamine amidotransferase YLR126C                                    |
| NNU_21337 | 109.819  | -3.101 | 0.338 | -6.218 | 5.04E-10  | 1.37E-07   | T-complex protein 1 subunit gamma-like isoform X2                              |
| NNU_02264 | 522.935  | -2.980 | 0.282 | -7.022 | 2.18E-12  | 8.07E-10   | dual specificity protein phosphatase 1-like                                    |
| NNU_03293 | 180.459  | -2.963 | 0.425 | -4.618 | 3.87E-06  | 0.00050675 | pre-mRNA-splicing factor SYF1                                                  |
| NNU_18536 | 233.984  | -2.946 | 0.525 | -3.708 | 0.000209  | 0.01827129 | indole-3-acetic acid-induced protein ARG7-like                                 |
| NNU_12769 | 410.309  | -2.918 | 0.474 | -4.048 | 5.16E-05  | 0.00533236 | glutamate receptor 2.7-like                                                    |
| NNU_16734 | 367.001  | -2.858 | 0.253 | -7.356 | 1.90E-13  | 8.48E-11   | probable voltage-gated potassium channel subunit beta                          |



|           |           |        |       |        |           |            |                                                              |
|-----------|-----------|--------|-------|--------|-----------|------------|--------------------------------------------------------------|
| NNU_25214 | 118.010   | -2.724 | 0.291 | -5.929 | 3.05E-09  | 6.94E-07   | GTP cyclohydrolase 1-like                                    |
| NNU_21373 | 11245.353 | -2.672 | 0.216 | -7.758 | 8.60E-15  | 5.09E-12   | probable (S)-N-methylcoclaurine 3;-hydroxylase isozyme 2     |
| NNU_18275 | 271.471   | -2.653 | 0.264 | -6.270 | 3.61E-10  | 9.94E-08   | uncharacterized protein LOC104606014                         |
| NNU_21566 | 253.846   | -2.611 | 0.221 | -7.284 | 3.23E-13  | 1.37E-10   | WAT1-related protein At5g07050-like isoform X2               |
| NNU_15257 | 289.119   | -2.608 | 0.416 | -3.867 | 0.00011   | 0.01025252 | uncharacterized protein LOC104589957                         |
| NNU_17478 | 4900.884  | -2.566 | 0.226 | -6.937 | 4.00E-12  | 1.39E-09   | probable RNA-dependent RNA polymerase 1                      |
| NNU_25483 | 218.127   | -2.507 | 0.257 | -5.867 | 4.43E-09  | 9.89E-07   | secoisolaricresinol dehydrogenase-like isoform X2            |
| NNU_15435 | 198.897   | -2.392 | 0.314 | -4.437 | 9.11E-06  | 0.00108412 | cation/H(+) antiporter 15-like                               |
| NNU_04090 | 494.957   | -2.344 | 0.317 | -4.242 | 2.22E-05  | 0.00250252 | 18.2 kDa class I heat shock protein-like                     |
| NNU_06754 | 178.281   | -2.335 | 0.222 | -6.013 | 1.83E-09  | 4.37E-07   | 2-hydroxyisoflavanone dehydratase-like isoform X3            |
| NNU_03226 | 1050.269  | -2.275 | 0.198 | -6.431 | 1.27E-10  | 3.75E-08   | uncharacterized protein LOC104606951 isoform X1              |
| NNU_04181 | 576.991   | -2.184 | 0.122 | -9.680 | 3.66E-22  | 5.77E-19   | anoctamin-like protein At1g73020                             |
| NNU_03121 | 2925.223  | -2.124 | 0.289 | -3.887 | 0.0001017 | 0.00959005 | "magnesium-chelatase subunit ChlH, chloroplastic"            |
| NNU_00972 | 1855.648  | -1.844 | 0.195 | -4.326 | 1.52E-05  | 0.00174665 | uncharacterized protein LOC104611602 isoform X1              |
| NNU_24310 | 2276.093  | -1.803 | 0.233 | -3.442 | 0.0005775 | 0.04423769 | esterase-like isoform X1                                     |
| NNU_05540 | 11273.342 | -1.648 | 0.169 | -3.831 | 0.0001277 | 0.01162967 | flavonoids synthase/flavanone 3-hydroxylase-like             |
| NNU_01203 | 1550.803  | 1.554  | 0.135 | 4.096  | 4.20E-05  | 0.00444365 | WD repeat-containing protein 75                              |
| NNU_04072 | 623.300   | 1.590  | 0.163 | 3.619  | 0.0002963 | 0.02487213 | uncharacterized protein LOC104585815                         |
| NNU_06963 | 1278.874  | 1.594  | 0.134 | 4.429  | 9.47E-06  | 0.00112033 | subtilisin-like protease SBT3.5                              |
| NNU_04073 | 1139.123  | 1.897  | 0.190 | 4.723  | 2.33E-06  | 0.00031632 | uncharacterized protein LOC104585815                         |
| NNU_16744 | 28578.280 | 1.968  | 0.197 | 4.917  | 8.78E-07  | 0.00013066 | chalcone synthase 1-like                                     |
| NNU_08477 | 1086.923  | 1.974  | 0.171 | 5.709  | 1.14E-08  | 2.41E-06   | Pyruvate decarboxylase isozyme 2                             |
| NNU_10466 | 459.424   | 1.974  | 0.193 | 5.057  | 4.26E-07  | 6.82E-05   | vacuolar protein sorting-associated protein 2 homolog 3-like |
| NNU_01884 | 328.596   | 2.039  | 0.271 | 3.827  | 0.0001298 | 0.01177377 | probable magnesium transporter NIPA8 isoform X3              |
| NNU_23269 | 211.059   | 2.058  | 0.290 | 3.654  | 0.0002587 | 0.02202665 | uncharacterized protein LOC104604536                         |

|           |          |       |       |        |           |            |                                                                 |
|-----------|----------|-------|-------|--------|-----------|------------|-----------------------------------------------------------------|
| NNU_02567 | 1674.260 | 2.222 | 0.271 | 4.506  | 6.61E-06  | 0.00082364 | uncharacterized protein LOC104604050 isoform X1                 |
| NNU_02186 | 2323.776 | 2.289 | 0.183 | 7.039  | 1.93E-12  | 7.26E-10   | very-long-chain 3-oxoacyl-CoA reductase 1                       |
| NNU_12937 | 806.917  | 2.311 | 0.248 | 5.289  | 1.23E-07  | 2.14E-05   | uncharacterized protein LOC104590170 isoform X1                 |
| NNU_02288 | 1647.803 | 2.312 | 0.186 | 7.053  | 1.75E-12  | 6.78E-10   | ribose-phosphate pyrophosphokinase 4                            |
| NNU_12943 | 227.285  | 2.599 | 0.313 | 5.114  | 3.16E-07  | 5.12E-05   | COBRA-like protein 6                                            |
| NNU_21105 | 331.709  | 2.640 | 0.220 | 7.439  | 1.02E-13  | 4.82E-11   | putative pentatricopeptide repeat-containing protein At1g68930  |
| NNU_03204 | 148.891  | 2.706 | 0.279 | 6.123  | 9.16E-10  | 2.31E-07   | "37S ribosomal protein S16, mitochondrial-like"                 |
| NNU_22952 | 9596.996 | 2.745 | 0.282 | 6.198  | 5.72E-10  | 1.53E-07   | putative lipid-transfer protein DIR1                            |
| NNU_02812 | 94.617   | 2.780 | 0.456 | 3.903  | 9.50E-05  | 0.00899347 | uncharacterized protein LOC104610418                            |
| NNU_10401 | 175.150  | 2.834 | 0.272 | 6.733  | 1.66E-11  | 5.32E-09   | dirigent protein 7-like                                         |
| NNU_15595 | 556.367  | 2.935 | 0.254 | 7.611  | 2.73E-14  | 1.47E-11   | disease resistance protein RPM1-like isoform X1                 |
| NNU_19796 | 42.089   | 2.976 | 0.566 | 3.492  | 0.0004794 | 0.03770347 | --                                                              |
| NNU_02799 | 83.097   | 2.978 | 0.401 | 4.935  | 8.03E-07  | 0.00012179 | uncharacterized protein LOC104597433                            |
| NNU_06656 | 818.987  | 3.040 | 0.173 | 11.769 | 5.66E-32  | 1.68E-28   | uncharacterized protein At4g22758-like                          |
| NNU_01692 | 4870.403 | 3.255 | 0.301 | 7.490  | 6.88E-14  | 3.32E-11   | anthocyanidin 3-O-glucosyltransferase 2-like                    |
| NNU_07927 | 369.052  | 3.374 | 0.480 | 4.943  | 7.69E-07  | 0.00011747 | transcription factor bHLH25-like                                |
| NNU_09299 | 1204.251 | 3.524 | 0.156 | 16.213 | 4.08E-59  | 9.67E-55   | hypothetical protein POPTR_0005s08840g [Populus<br>trichocarpa] |
| NNU_22627 | 169.956  | 3.622 | 0.545 | 4.807  | 1.53E-06  | 0.00021562 | "protein CutA 1, chloroplastic-like isoform X2"                 |
| NNU_17479 | 1020.024 | 3.690 | 0.203 | 13.263 | 3.80E-40  | 1.80E-36   | sec14 cytosolic factor-like isoform X1                          |
| NNU_06751 | 650.116  | 3.827 | 0.327 | 8.658  | 4.81E-18  | 4.22E-15   | 2-hydroxyisoflavanone dehydratase-like                          |
| NNU_02860 | 212.770  | 4.008 | 0.350 | 8.594  | 8.39E-18  | 7.10E-15   | ras-related protein RABA4d                                      |
| NNU_09866 | 925.564  | 4.021 | 0.268 | 11.275 | 1.74E-29  | 4.57E-26   | protein TRANSPARENT TESTA 12 isoform X2                         |
| NNU_20906 | 566.053  | 4.074 | 0.497 | 6.186  | 6.16E-10  | 1.62E-07   | GATA transcription factor 21-like                               |
| NNU_17649 | 70.135   | 4.082 | 0.741 | 4.159  | 3.19E-05  | 0.00345266 | F-box protein At4g09920                                         |
| NNU_05623 | 138.114  | 4.299 | 0.607 | 5.436  | 5.44E-08  | 9.91E-06   | uncharacterized protein LOC104590014                            |

|           |          |       |       |        |           |            |                                                                      |
|-----------|----------|-------|-------|--------|-----------|------------|----------------------------------------------------------------------|
| NNU_08538 | 195.296  | 4.362 | 0.311 | 10.808 | 3.17E-27  | 7.50E-24   | uncharacterized protein LOC104589039 isoform X1                      |
| NNU_05730 | 65.723   | 4.363 | 0.585 | 5.746  | 9.15E-09  | 1.95E-06   | unnamed protein product                                              |
| NNU_16593 | 46.492   | 4.568 | 0.876 | 4.073  | 4.64E-05  | 0.00481552 | aldo-keto reductase                                                  |
| NNU_02910 | 123.923  | 4.610 | 0.539 | 6.702  | 2.06E-11  | 6.50E-09   | uncharacterized protein LOC104597541                                 |
| NNU_19679 | 54.923   | 4.705 | 1.076 | 3.444  | 0.0005727 | 0.04401723 | uncharacterized protein LOC104588063                                 |
| NNU_09103 | 1083.933 | 4.831 | 0.685 | 5.593  | 2.23E-08  | 4.46E-06   | extracellular ribonuclease LE-like                                   |
| NNU_25125 | 362.600  | 4.960 | 0.391 | 10.123 | 4.37E-24  | 8.70E-21   | flotillin-like protein 4                                             |
| NNU_07677 | 121.087  | 5.167 | 0.839 | 4.965  | 6.87E-07  | 0.00010564 | "LL-diaminopimelate aminotransferase, chloroplastic-like isoform X3" |
| NNU_22805 | 78.697   | 5.525 | 1.028 | 4.403  | 1.07E-05  | 0.00125773 | zeatin O-glucosyltransferase-like                                    |
| NNU_05068 | 1884.713 | 5.714 | 0.299 | 15.742 | 7.82E-56  | 6.17E-52   | peroxisomal (S)-2-hydroxy-acid oxidase GLO4-like                     |
| NNU_06612 | 450.450  | 5.725 | 0.503 | 9.395  | 5.72E-21  | 7.13E-18   | "lycopene epsilon cyclase, chloroplastic isoform X2"                 |
| NNU_25678 | 74.312   | 5.951 | 0.948 | 5.222  | 1.77E-07  | 3.03E-05   | F-box protein At3g07870-like                                         |
| NNU_23143 | 9.523    | 6.143 | 1.427 | 3.604  | 0.0003134 | 0.02584899 | protein ROOT PRIMORDIUM DEFECTIVE 1-like                             |
| NNU_09116 | 7.664    | 6.298 | 1.522 | 3.480  | 0.0005011 | 0.03927902 | flotillin-like protein 4                                             |
| NNU_04984 | 9.404    | 6.341 | 1.464 | 3.648  | 0.0002644 | 0.02243526 | "calcium-transporting ATPase 12, plasma membrane-type-like"          |
| NNU_06947 | 10.367   | 6.382 | 1.466 | 3.671  | 0.0002416 | 0.02079801 | --                                                                   |
| NNU_05732 | 52.292   | 6.498 | 0.924 | 5.947  | 2.73E-09  | 6.28E-07   | hypothetical protein ZEAMMB73_659156 [Zea mays]                      |
| NNU_10247 | 17.124   | 6.887 | 1.363 | 4.318  | 1.58E-05  | 0.00179524 | uncharacterized protein LOC104602732 isoform X3                      |
| NNU_06922 | 12.793   | 7.032 | 1.348 | 4.476  | 7.60E-06  | 0.0009268  | --                                                                   |
| NNU_02784 | 80.856   | 7.171 | 0.786 | 7.849  | 4.19E-15  | 2.61E-12   | pentatricopeptide repeat-containing protein At3g12770-like           |
| NNU_10084 | 14.728   | 7.271 | 1.364 | 4.598  | 4.27E-06  | 0.00055533 | uncharacterized protein LOC104593377                                 |
| NNU_03146 | 21.416   | 7.277 | 1.332 | 4.713  | 2.44E-06  | 0.00032847 | uncharacterized protein LOC104585899                                 |
| NNU_09212 | 17.819   | 7.501 | 1.416 | 4.590  | 4.44E-06  | 0.00057288 | CTD nuclear envelope phosphatase 1 homolog                           |

|           |         |       |       |       |          |            |                                                                                    |
|-----------|---------|-------|-------|-------|----------|------------|------------------------------------------------------------------------------------|
| NNU_22778 | 32.520  | 7.545 | 1.279 | 5.119 | 3.08E-07 | 5.02E-05   | probable LRR receptor-like serine/threonine-protein kinase<br>At3g47570 isoform X1 |
| NNU_23034 | 19.476  | 7.589 | 1.379 | 4.779 | 1.76E-06 | 0.00024517 | --                                                                                 |
| NNU_04979 | 37.407  | 7.618 | 1.478 | 4.478 | 7.55E-06 | 0.0009258  | "beta-Amyrin Synthase 1-like, partial"                                             |
| NNU_19678 | 73.190  | 7.750 | 1.388 | 4.863 | 1.16E-06 | 0.0001678  | --                                                                                 |
| NNU_02207 | 18.410  | 7.899 | 1.424 | 4.846 | 1.26E-06 | 0.00018205 | RNA polymerase II C-terminal domain phosphatase-like 1                             |
| NNU_03887 | 30.516  | 7.919 | 1.307 | 5.294 | 1.19E-07 | 2.09E-05   | hypothetical protein L484_010893                                                   |
| NNU_01592 | 25.588  | 7.981 | 1.359 | 5.135 | 2.82E-07 | 4.63E-05   | uncharacterized protein LOC104606841                                               |
| NNU_24729 | 19.489  | 8.000 | 1.495 | 4.681 | 2.85E-06 | 0.00038097 | uncharacterized protein LOC104609700                                               |
| NNU_18918 | 92.931  | 8.109 | 1.008 | 7.051 | 1.78E-12 | 6.80E-10   | 40S ribosomal protein S13-like                                                     |
| NNU_02485 | 30.564  | 8.126 | 1.450 | 4.913 | 8.95E-07 | 0.00013238 | anthocyanidin reductase-like isoform X1 [Vitis vinifera]                           |
| NNU_21730 | 70.704  | 8.215 | 1.255 | 5.747 | 9.06E-09 | 1.95E-06   | S-norcochlorogenic acid synthase-like                                              |
| NNU_10383 | 60.656  | 8.424 | 1.282 | 5.792 | 6.97E-09 | 1.51E-06   | cellulose synthase, putative                                                       |
| NNU_19155 | 42.305  | 8.648 | 1.283 | 5.959 | 2.54E-09 | 5.89E-07   | probable LRR receptor-like serine/threonine-protein kinase<br>At1g56140 isoform X2 |
| NNU_16404 | 87.457  | 8.781 | 1.230 | 6.326 | 2.52E-10 | 7.11E-08   | pectinesterase                                                                     |
| NNU_20167 | 42.291  | 8.905 | 1.303 | 6.069 | 1.29E-09 | 3.18E-07   | alanine--glyoxylate aminotransferase 2 homolog 1,<br>mitochondrial                 |
| NNU_18966 | 35.772  | 8.940 | 1.281 | 6.198 | 5.73E-10 | 1.53E-07   | casparian strip membrane protein 2-like                                            |
| NNU_00440 | 70.483  | 9.342 | 1.282 | 6.507 | 7.67E-11 | 2.30E-08   | probable receptor-like protein kinase At5g39020                                    |
| NNU_24113 | 96.386  | 9.516 | 1.215 | 7.008 | 2.42E-12 | 8.83E-10   | acetylornithine deacetylase-like                                                   |
| NNU_25356 | 50.157  | 9.529 | 1.422 | 5.999 | 1.99E-09 | 4.71E-07   | uncharacterized protein LOC104591318                                               |
| NNU_10386 | 104.527 | 9.566 | 1.251 | 6.849 | 7.46E-12 | 2.49E-09   | dammarenydiol 12-hydroxylase-like                                                  |
| NNU_10885 | 83.395  | 9.599 | 1.214 | 7.081 | 1.43E-12 | 5.63E-10   | "pentatricopeptide repeat-containing protein At4g16835,<br>mitochondrial-like"     |

|           |          |        |       |        |          |          |                                                                                    |
|-----------|----------|--------|-------|--------|----------|----------|------------------------------------------------------------------------------------|
| NNU_15937 | 130.128  | 10.191 | 1.212 | 7.584  | 3.36E-14 | 1.77E-11 | vacuolar protein sorting-associated protein VTA1 homolog<br>isoform X1             |
| NNU_06620 | 141.535  | 10.632 | 1.200 | 8.026  | 1.01E-15 | 7.24E-13 | F-box/FBD/LRR-repeat protein At5g56420-like                                        |
| NNU_14867 | 223.628  | 10.718 | 1.307 | 7.435  | 1.05E-13 | 4.86E-11 | uncharacterized protein LOC104607328                                               |
| NNU_19156 | 171.699  | 10.822 | 1.207 | 8.140  | 3.96E-16 | 3.02E-13 | probable LRR receptor-like serine/threonine-protein kinase<br>At1g56140 isoform X2 |
| NNU_09114 | 202.821  | 10.838 | 1.213 | 8.109  | 5.10E-16 | 3.77E-13 | calcium-binding mitochondrial carrier protein SCaMC-1-like                         |
| NNU_12337 | 281.338  | 11.854 | 1.231 | 8.816  | 1.19E-18 | 1.17E-15 | uncharacterized protein LOC104595426                                               |
| NNU_03972 | 425.435  | 12.272 | 1.254 | 8.986  | 2.56E-19 | 2.88E-16 | myb-related protein 330-like                                                       |
| NNU_03253 | 2906.416 | 12.423 | 0.780 | 14.654 | 1.28E-48 | 7.57E-45 | glutathione S-transferase F11-like                                                 |
| NNU_24494 | 218.107  | 22.389 | 4.247 | 5.036  | 4.76E-07 | 7.46E-05 | uncharacterized protein LOC104594007                                               |

---

**Supplemental Table S5.** Gene ID and accession numbers of *GSTs* used for phylogenetic analysis.

| <b>Gene name</b> | <b>Accession</b>  | <b>Gene name</b> | <b>Accession</b> |
|------------------|-------------------|------------------|------------------|
| AtDHAR1          | AT1G19570.1       | NnGST1           | XP_010270817.1   |
| AtDHAR2          | AT1G75270.1       | NnGST2           | XP_010270745.1   |
| AtDHAR3          | AT5G16710.1       | NnGST3           | XP_019054394.1   |
| AtDHAR4          | Q9FG59.1          | NnGST4           | DAD19041.1       |
| AtDHAR5          | AT1G19550.1       | NnGST5           | XP_010272271.1   |
| AtEF1B1          | AT1G09640.1       | NnGST6           | XP_010269470.1   |
| AtEF1B2          | AT1G57720.1       | NnGST7           | XP_010269471.1   |
| AtGHR1           | AT4G20940.1       | NnGST8           | XP_010259661.1   |
| AtGHR2           | NP_001119375.1    | NnGST9           | XP_010259659.1   |
| AtGHR3           | NP_001031672.1    | NnGST10          | XP_010259660.1   |
| AtGHR4           | POPTR_0001S34980G | NnGST11          | XP_010242290.1   |
| AtGSTF1          | P42769.1          | NnGST12          | XP_010272551.1   |
| AtGSTF10         | AT2G30870.1       | NnGST13          | XP_010270300.1   |
| AtGSTF11         | AT3G03190.1       | NnGST14          | XP_010269081.1   |
| AtGSTF12         | AT5G17220.1       | NnGST15          | XP_010253346.1   |
| AtGSTF13         | AT3G62760.1       | NnGST16          | XP_010260035.1   |
| AtGSTF14         | AT1G49860.1       | NnGST17          | XP_010274730.1   |
| AtGSTF2          | AT4G02520.1       | NnGST18          | XP_010255416.1   |
| AtGSTF3          | AT2G02930.1       | NnGST19          | DAD25226.1       |
| AtGSTF4          | AT1G02950.1       | NnGST20          | XP_010253425.1   |
| AtGSTF5          | AT1G02940.1       | NnGST21          | XP_010259964.1   |
| AtGSTF6          | AT1G02930.1       | NnGST22          | XP_010270861.1   |
| AtGSTF7          | AT1G02920.1       | NnGST23          | XP_010253430.1   |
| AtGSTF8          | AT2G47730.1       | NnGST24          | XP_010264895.1   |
| AtGSTF9          | AT2G30860.1       | NnGST25          | XP_010276184.1   |
| AtGSTL1          | AT5G02780.1       | NnGST26          | XP_010252225.1   |
| AtGSTL2          | AT3G55040.1       | NnGST27          | DAD18685.1       |
| AtGSTL3          | AT5G02790.1       | NnGST28          | XP_010265991.1   |
| AtGSTT1          | AT5G41210.1       | NnGST29          | XP_010255950.1   |
| AtGSTT2          | AT5G41240.1       | NnGST30          | DAD31247.1       |
| AtGSTT3          | AT5G41220.1       | NnGST31          | XP_010258434.1   |
| AtGSTU1          | AT2G29490.1       | NnGST32          | XP_010271921.1   |
| AtGSTU10         | AT1G74590.1       | NnGST33          | XP_010279423.1   |
| AtGSTU11         | AT1G69930.1       | NnGST34          | XP_010271919.1   |
| AtGSTU12         | AT1G69920.1       | NnGST35          | XP_010279540.1   |
| AtGSTU13         | AT1G27130.1       | NnGST36          | XP_010278876.1   |
| AtGSTU14         | AT1G27140.1       | NnGST37          | XP_010257729.1   |
| AtGSTU15         | AT1G59670.1       | NnGST38          | XP_010276441.1   |
| AtGSTU16         | AT1G59700.1       | NnGST39          | XP_010243633.1   |

|          |                |          |                |
|----------|----------------|----------|----------------|
| AtGSTU17 | AT1G10370.1    | NnGST40  | XP_010243635.1 |
| AtGSTU18 | AT1G10360.1    | NnGST41  | DAD20129.1     |
| AtGSTU19 | AT1G78380.1    | NnGST42  | XP_010253818.1 |
| AtGSTU2  | AT2G29480.1    | NnGST43  | XP_019054125.1 |
| AtGSTU20 | AT1G78370.1    | NnGST44  | XP_019054126.1 |
| AtGSTU21 | AT1G78360.1    | NnGST45  | XP_010264128.1 |
| AtGSTU22 | AT1G78340.1    | NnGST46  | XP_010243633.1 |
| AtGSTU23 | AT1G78320.1    | NnGST47  | XP_010269443.1 |
| AtGSTU24 | AT1G17170.1    | NnGST48  | XP_010243636.1 |
| AtGSTU25 | AT1G17180.1    | NnGST49  | XP_010263987.1 |
| AtGSTU26 | AT1G17190.1    | NnGST50  | XP_010243637.1 |
| AtGSTU27 | AT3G43800.1    | NnGST51  | DAD20138.1     |
| AtGSTU28 | AT1G53680.1    | NnGST52  | DAD20132.1     |
| AtGSTU3  | AT2G29470.1    | NnGST53  | DAD33380.1     |
| AtGSTU4  | AT2G29460.1    | NnGST54  | DAD33379.1     |
| AtGSTU5  | AT2G29450.1    | NnGST55  | DAD20134.1     |
| AtGSTU6  | AT2G29440.1    | NnGST56  | XP_043696296.1 |
| AtGSTU7  | AT2G29420.1    | NnGST57  | XP_010269621.1 |
| AtGSTU8  | AT3G09270.1    | NnGST58  | DAD20131.1     |
| AtGSTU9  | AT5G62480.1    | NnGST59  | XP_010243638.1 |
| AtGSTZ1  | AT2G02390.1    | NnGST60  | XP_010248269.1 |
| AtGSTZ2  | AT2G02380.1    | NnGST61  | DAD20133.1     |
| AtTCHQD1 | NP_001031292.1 | NnGST62  | DAD20130.1     |
| ZmGSTF1  | NP_001105626.1 | NnGST63  | DAD18886.1     |
| ZmGSTF2  | NP_001105366.1 | NnGST64  | DAD38436.1     |
| ZmGSTF3  | NP_001105720.2 | NnGST65  | XP_010245128.1 |
| ZmGSTF4  | ACG25283.1     | NnGST66  | XP_010245130.1 |
| ZmGSTF5  | NP_001105111.2 | NnGST67  | XP_010245129.1 |
| ZmGSTF7  | ACF80172.1     | PhAN9    | CAA68993.1     |
| ZmGSTU1  | NP_001104989.1 | VvGSTF12 | XP_034683898.1 |
| ZmGSTU10 | ONM39050.1     | FvRAP    | XP_004288578.1 |
| ZmGSTU11 | AAG34828.1     | PpRiant  | ALE31200.1     |
| ZmGSTU14 | XP_008674526.1 | MdGSTF6  | NP_001315851.1 |
| ZmGSTU2  | AQK85998.1     |          |                |
| ZmGSTU24 | ONM39050.1     |          |                |
| ZmGSTU25 | ONM39033.1     |          |                |
| ZmGSTU26 | NP_001266752.2 |          |                |
| ZmGSTU27 | ACF84945.1     |          |                |
| ZmGSTU3  | AQK85978.1     |          |                |
| ZmGSTU6  | NP_001152168.1 |          |                |
| ZmGSTU7  | NP_001153168.1 |          |                |
| ZmGSTU8  | NP_001152486.1 |          |                |
| ZmGSTZ1  | XP_008661994.1 |          |                |

---
